# Supplementary material
Source: publisher site journal article supplement (https://www.dovepress.com/article/278614)
Supplement: Supplementary file 1 [file get_supplementary_file.php]

**Supplementary Table 1: Results of the univariate logistic regression analyses between BPS complexity assessed by means of the INTERMED and presence of psychiatric comorbidity in the two groups**

|  |  | **CRPS (N=103)** |  |  | **Non-CRPS (N=290)** |  |
| --- | --- | --- | --- | --- | --- | --- |
|  | **OR** | **95% CI** | **p-value** | **OR** | **95% CI** | **p-value** |
| **INTERMED** | Continuous scores | | | | | |
| **Total** | 1.34 | 1.18-1.51 | **<0.001** | 1.20 | 1.13-1.28 | **<0.001** |
| **Biological** | 2.00 | 1.30-3.06 | **0.002** | 1.33 | 1.07-1.66 | **0.009** |
| **Psychological** | 2.04 | 1.52-2.73 | **<0.001** | 1.65 | 1.41-1.92 | **<0.001** |
| **Social** | 1.79 | 1.36-2.35 | **<0.001** | 1.35 | 1.15-1.59 | **<0.001** |
| **Health care** | 1.78 | 1.29-2.46 | **<0.001** | 1.40 | 1.17-1.67 | **<0.001** |

**Abbreviations:** CRPS: complex regional pain syndrome, OR (95%CI): Odds ratio and 95% confidence intervals. Significant p-values (<0.05) are in bold

**Supplementary Table 2: Results of the multiple logistic regression analyses (adjusted for age, gender and pain) between BPS complexity assessed by means of the INTERMED and presence of psychiatric comorbidity in the subgroup of CRPS patients using the Budapest Criteria.**

|  | **CRPS patients using the Budapest Criteria**  **(N=57)** | | |
| --- | --- | --- | --- |
|  | **OR** | **95% CI** | **p-value** |
| **INTERMED** | **Continuous scores** | | |
| **Total** | 1.29 | 1.10-1.51 | **0.001** |
| **Biological** | 1.85 | 1.01-3.37 | **0.04** |
| **Psychological** | 2.10 | 1.40-3.14 | **<0.001** |
| **Social** | 2.17 | 1.30-3.63 | **0.003** |
| **Health care** | 1.26 | 1.02-2.25 | **0.04** |

**Abbreviations:** CRPS: complex regional pain syndrome; OR (95%CI): Odds ratio and 95% confidence intervals. Significant p-values (<0.05) are in bold
